# Supplementary material for: Hypothalamic loss of Snord116 recapitulates the hyperphagia of Prader-Willi syndrome
Source: PubMed Central journal article supplement (PMC5824864; doi:10.1172/jci97007), 2018-01-29
Supplement: jci-128-97007-s001.pdf [file jci-128-97007-s001.pdf]

# Supplementary Figure 1

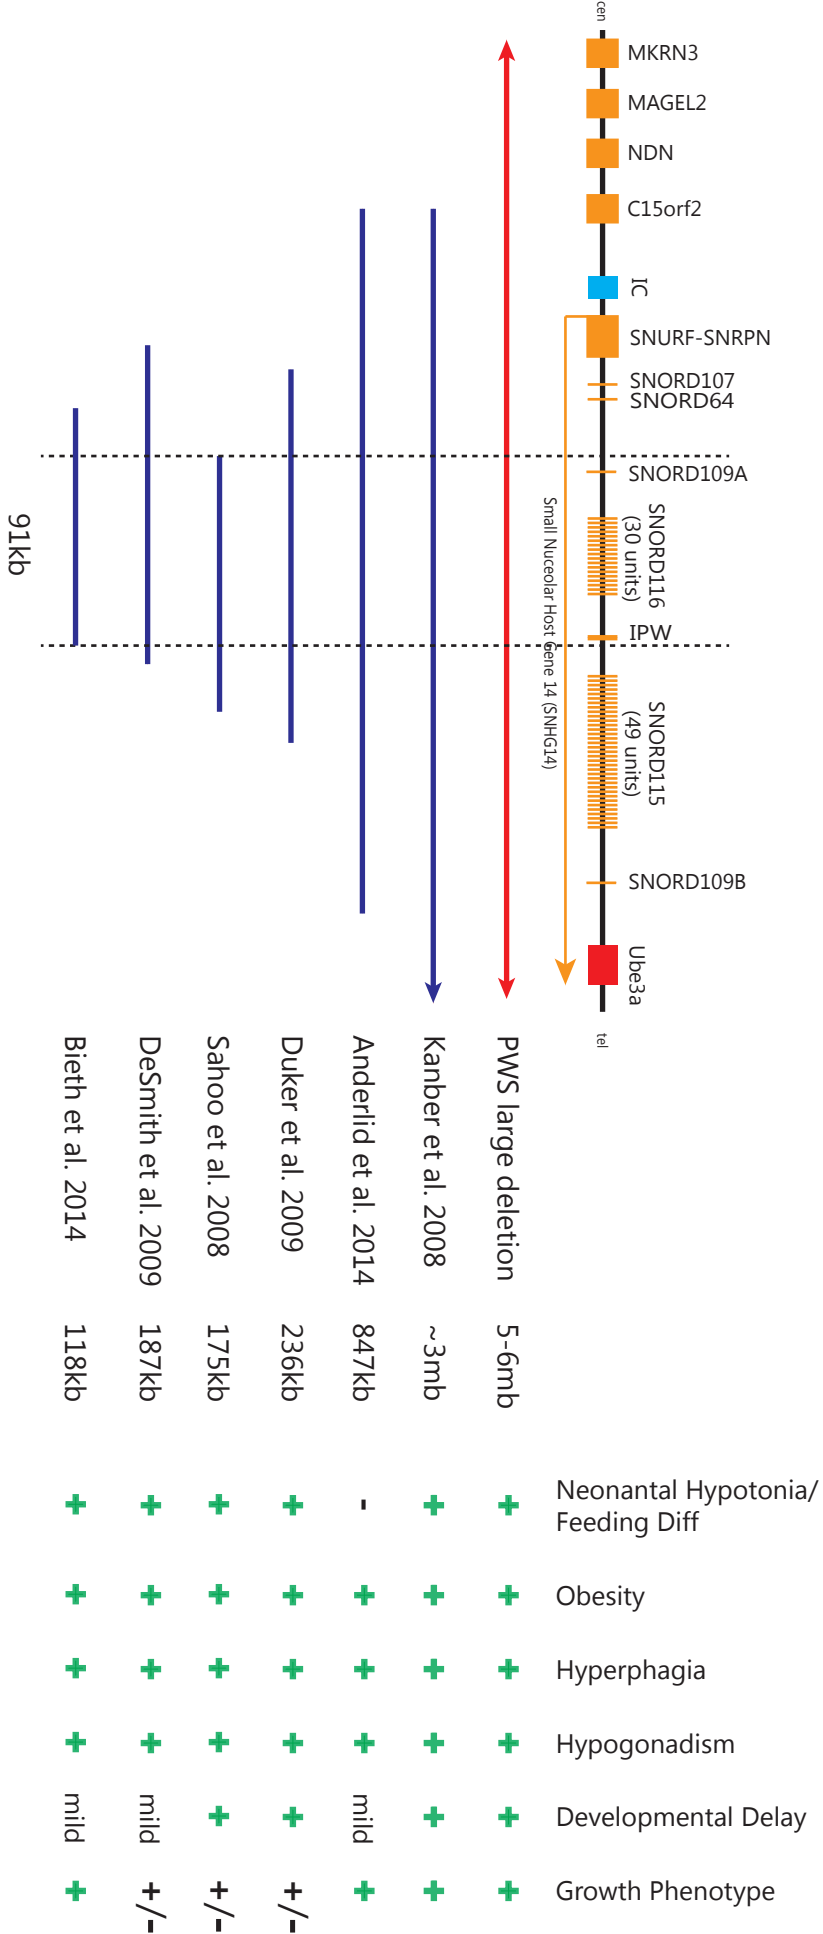

## Supplementary Figure 2

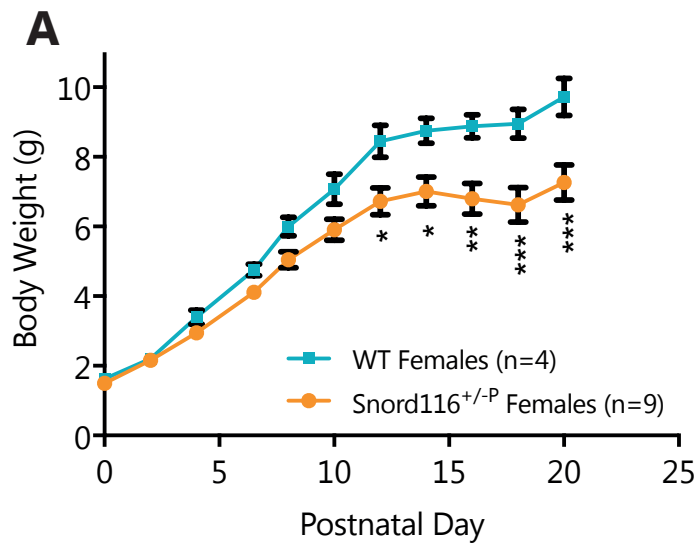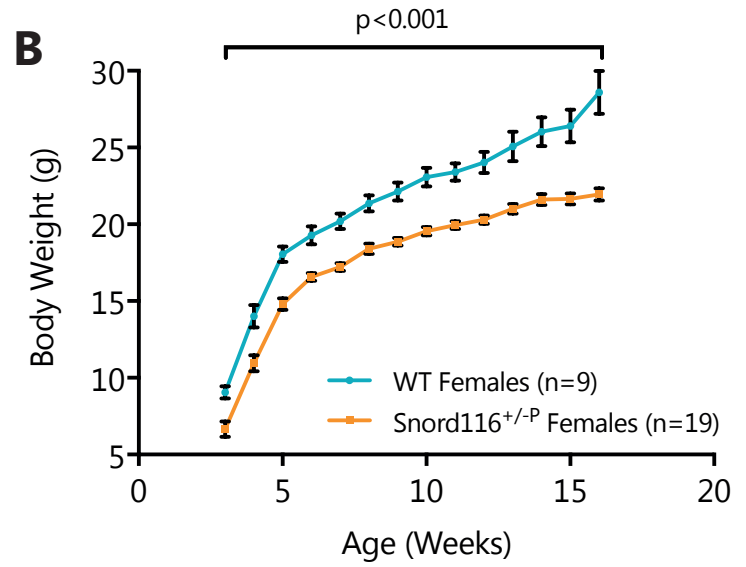

## Supplementary Figure 3

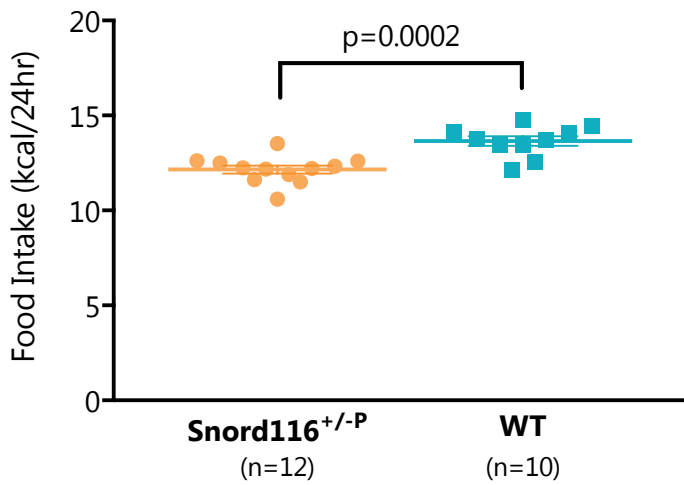

# Supplementary Figure 4

**A**

4-hour Refeeding: Chow Diet

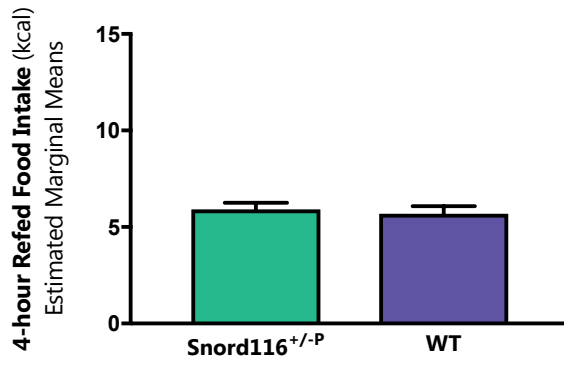

**B**

4-hour Refeeding: 45% HFD Diet

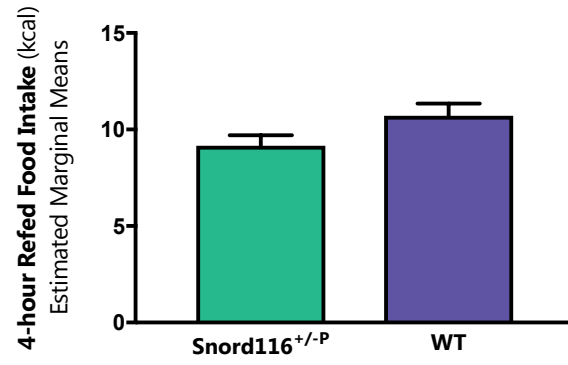

**C**

24-hour Refeeding: Chow Diet

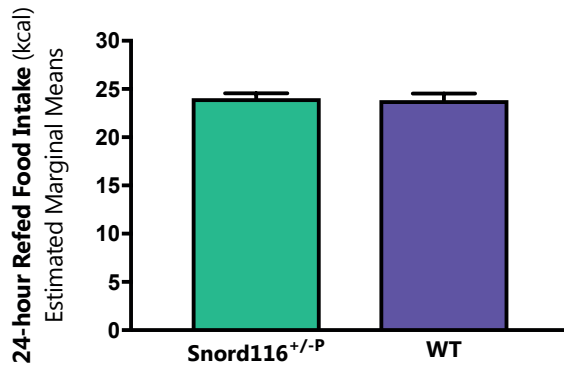

**D**

24-hour Refeeding: 45% HFD Diet

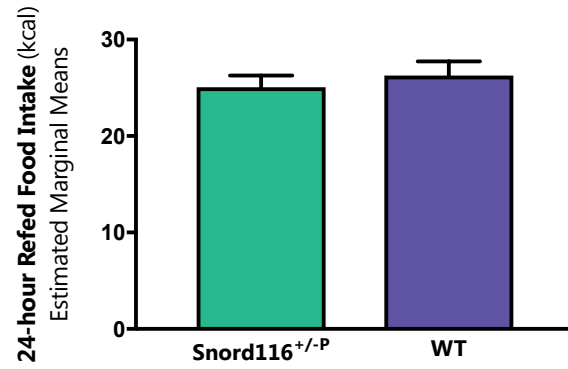

# Supplementary Figure 5

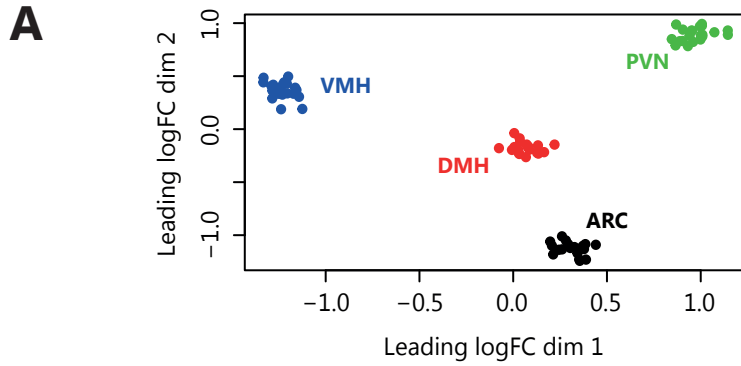

**B**

| VMH | Gene name                                   | Symbol         | Location            | logFC | p-value | FDR   |
|-----|---------------------------------------------|----------------|---------------------|-------|---------|-------|
|     | Nuclear receptor subfamily 5 grp A member 1 | <b>Nr5a1</b>   | Nucleus             | 7.04  | 5E-49   | 6E-46 |
|     | FEZ family zinc finger 1                    | <b>Fezf1</b>   | n/a                 | 5.45  | 4E-60   | 9E-57 |
|     | G protein-coupled receptor 149              | <b>Gpr149</b>  | Plasma Membrane     | 4.67  | 2E-32   | 8E-30 |
|     | Zinc finger protein 831                     | <b>Zfp831</b>  | n/a                 | 4.55  | 3E-29   | 9E-27 |
|     | Neurogranin                                 | <b>Nrgn</b>    | Plasma Membrane     | 3.56  | 6E-33   | 3E-30 |
|     | Adenylate cyclase activating polypeptide 1  | <b>Adcyap1</b> | Extracellular Space | 3.40  | 3E-34   | 1E-31 |
|     | Dendrin                                     | <b>Ddn</b>     | Nucleus             | 3.26  | 6E-13   | 4E-11 |
|     | Neuronal pentraxin 2                        | <b>Nptx2</b>   | Extracellular Space | 3.23  | 6E-18   | 7E-16 |
|     | Ankycorbin                                  | <b>Rai14</b>   | Multiple            | 3.04  | 1E-18   | 2E-16 |
|     | Homeodomain interacting protein kinase 4    | <b>Hipk4</b>   | Cytoplasm           | 3.00  | 2E-32   | 7E-30 |

| ARC | Gene name                                | Symbol           | Location            | logFC | p-value | FDR   |
|-----|------------------------------------------|------------------|---------------------|-------|---------|-------|
|     | Cellular retinoic acid binding protein 1 | <b>Crabp1</b>    | Cytoplasm           | 6.79  | 2E-39   | 5E-36 |
|     | Neuropeptide Y                           | <b>Npy</b>       | Extracellular Space | 5.92  | 7E-44   | 2E-40 |
|     | Agouti related neuropeptide              | <b>Agrp</b>      | Extracellular Space | 5.90  | 1E-38   | 2E-35 |
|     | Proopiomelanocortin                      | <b>Pomc</b>      | Extracellular Space | 5.46  | 3E-79   | 4E-75 |
|     | T-box 3                                  | <b>Tbx3</b>      | Nucleus             | 4.50  | 5E-48   | 3E-44 |
|     | RAS guanyl releasing protein 1           | <b>Rasgrp1</b>   | Cytoplasm           | 2.89  | 6E-46   | 2E-42 |
|     | Growth hormone-releasing hormone         | <b>Ghrh</b>      | Extracellular Space | 2.76  | 2E-08   | 2E-06 |
|     | Serpin family A member 3                 | <b>Serpina3n</b> | Extracellular Space | 2.73  | 8E-38   | 1E-34 |
|     | Tachykinin 2                             | <b>Tac2</b>      | Extracellular Space | 2.68  | 2E-05   | 1E-03 |
|     | Leucine rich repeat containing 9         | <b>Lrrc9</b>     | n/a                 | 2.59  | 2E-30   | 4E-27 |

| PVN | Gene name                                   | Symbol       | Location            | logFC | p-value | FDR   |
|-----|---------------------------------------------|--------------|---------------------|-------|---------|-------|
|     | Arginine vasopressin                        | <b>Avp</b>   | Extracellular space | 7.68  | 1E-80   | 6E-77 |
|     | Oxytocin/neurophysin I prepropeptide        | <b>Oxt</b>   | Extracellular Space | 7.32  | 5E-83   | 4E-79 |
|     | Urocortin 3                                 | <b>Ucn3</b>  | Extracellular Space | 5.86  | 7E-17   | 2E-14 |
|     | Forkhead box B2                             | <b>Foxb2</b> | Nucleus             | 5.52  | 7E-14   | 1E-11 |
|     | FEZ family zinc finger 2                    | <b>Fezf2</b> | Nucleus             | 5.31  | 1E-18   | 4E-16 |
|     | PR domain 8                                 | <b>Prdm8</b> | Nucleus             | 5.27  | 1E-22   | 6E-20 |
|     | UNC homeobox                                | <b>Uncx</b>  | n/a                 | 5.17  | 2E-40   | 3E-37 |
|     | Single-minded family transcription factor 1 | <b>Sim1</b>  | Nucleus             | 5.12  | 9E-35   | 2E-31 |
|     | Corticotropin releasing hormone             | <b>Crh</b>   | Extracellular Space | 5.03  | 2E-26   | 2E-23 |
|     | Death associated protein-like 1             | <b>Dapl1</b> | n/a                 | 4.85  | 1E-07   | 6E-06 |

| DMH | Gene name                                     | Symbol         | Location            | logFC | p-value | FDR   |
|-----|-----------------------------------------------|----------------|---------------------|-------|---------|-------|
|     | hypocretin (orexin) neuropeptide precursor    | <b>Hcrt</b>    | Extracellular Space | 8.25  | 2E-42   | 2E-38 |
|     | neuropeptide VF precursor                     | <b>Npvf</b>    | Extracellular Space | 7.70  | 2E-79   | 3E-75 |
|     | pro-melanin concentrating hormone             | <b>Pmch</b>    | Extracellular Space | 5.59  | 2E-24   | 7E-21 |
|     | PARP1 binding protein                         | <b>Parpbp</b>  | Nucleus             | 5.58  | 5E-28   | 2E-24 |
|     | G protein-coupled receptor 50                 | <b>Gpr50</b>   | Plasma Membrane     | 3.95  | 6E-13   | 7E-10 |
|     | histidine decarboxylase                       | <b>Hdc</b>     | Cytoplasm           | 2.61  | 8E-09   | 4E-06 |
|     | galanin and GMAP prepropeptide                | <b>Gal</b>     | Extracellular space | 2.31  | 2E-10   | 2E-07 |
|     | Distal-Less Homeo Box 1                       | <b>Dlx1</b>    | Nucleus             | 2.18  | 8E-05   | 8E-03 |
|     | protein phosphatase 1 regulatory subunit 17   | <b>Ppp1r17</b> | Cytoplasm           | 1.99  | 6E-15   | 2E-11 |
|     | suppression of tumorigenicity 18, zinc finger | <b>St18</b>    | Nucleus             | 1.96  | 2E-09   | 9E-07 |

# Supplementary Figure 6

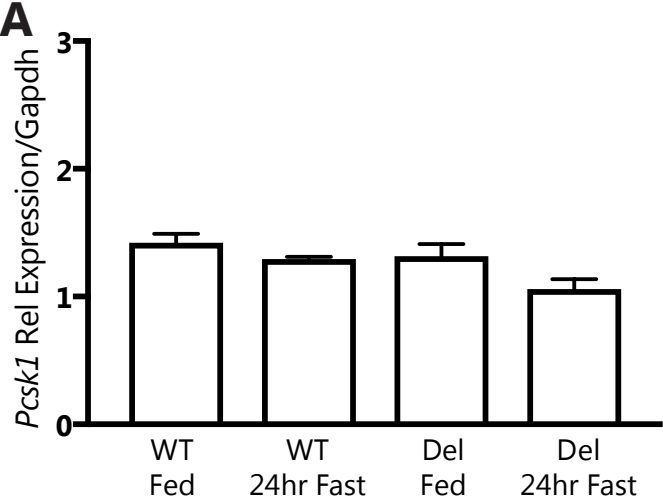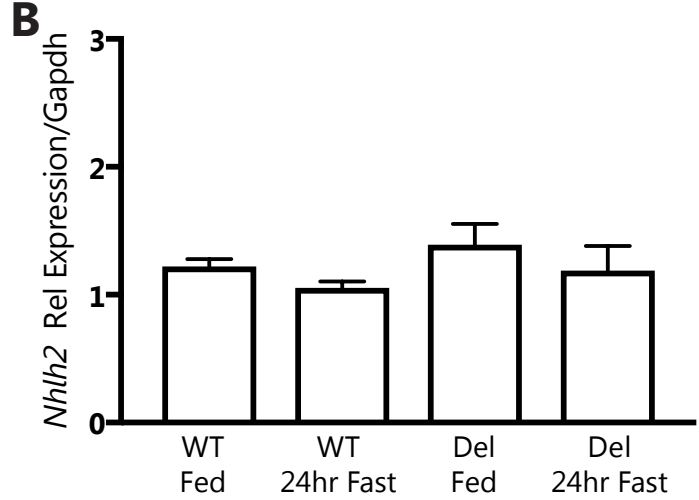

## Supplementary Figure 7

### A. Cre targeting with stereotaxic surgery

Images of brain sections from the mediobasal hypothalamus with Cre immunostaining (rabbit anti-Cre, 1:10,000, Novagen) visualised with DAB. Staining was used to determine “hits” or “misses” in terms of stereotaxic injection of AAV-Cre, with hits defined by the presence of Cre expression bilaterally within any portion of the mediobasal hypothalamus, from the start of the arcuate nucleus (~Bregma -1.22 through to the end of the third ventricle ~Bregma -2.70).

| ID | MBH (Anterior) Cre IHC                                                              | MBH (Posterior) Cre IHC                                                             | Targeting                      | % original BW at 10 wks post-surgery |
|----|-------------------------------------------------------------------------------------|-------------------------------------------------------------------------------------|--------------------------------|--------------------------------------|
| 1  | 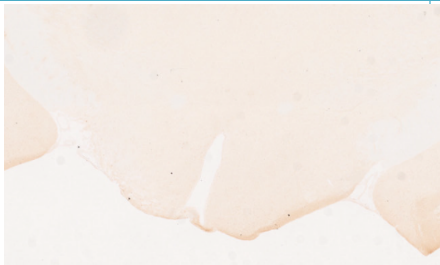   |   | <b>Hit</b><br>Arc              | 142.41                               |
| 2  |   |  | <b>Hit</b><br>Arc<br>VMH<br>LH | 114.12                               |
| 3  |  |  | <b>Miss</b><br>Unilateral      | 108.70                               |
| 4  |  | N/A                                                                                 | <b>Hit</b><br>Arc<br>VMH<br>LH | 106.14                               |

Supplementary Figure 7

| ID | MBH (Anterior) Cre IHC                                                              | MBH (Posterior) Cre IHC                                                              | Targeting                      | % original BW at 10 wks post-surgery |
|----|-------------------------------------------------------------------------------------|--------------------------------------------------------------------------------------|--------------------------------|--------------------------------------|
| 5  | N/A                                                                                 | 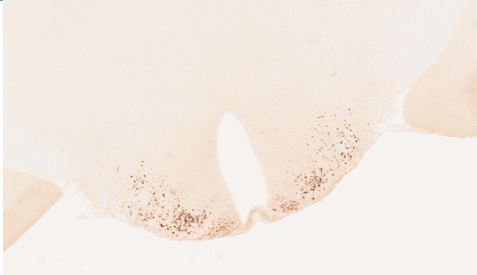   | <b>Hit</b><br>Arc<br>VMH<br>LH | 150.53                               |
| 6  |    |     | <b>Miss</b>                    | 111.51                               |
| 7  |   |   | <b>Hit</b><br>Arc              | 132.17                               |
| 8  |  |  | <b>Hit</b><br>Arc<br>VMH<br>LH | 113.36                               |
| 9  |  |  | <b>Hit</b><br>Arc<br>VMH<br>LH | 109.82                               |
| 10 |  | N/A                                                                                  | <b>Hit</b><br>Arc<br>VMH<br>LH | 140.48                               |

Supplementary Figure 7

| ID | MBH (Anterior) Cre IHC                                                              | MBH (Posterior) Cre IHC                                                              | Targeting                      | % original BW at 10 wks post-surgery |
|----|-------------------------------------------------------------------------------------|--------------------------------------------------------------------------------------|--------------------------------|--------------------------------------|
| 11 |    |    | <b>Hit</b><br>Arc              | 142.49                               |
| 12 |    |    | <b>Hit</b><br>Arc<br>VMH<br>LH | 124.28                               |
| 13 |   |   | <b>Hit</b><br>Arc              | 159.11                               |
| 14 |  |  | <b>Hit</b><br>Arc<br>VMH<br>LH | 126.61                               |
| 15 |  |  | <b>Hit</b><br>Arc<br>VMH<br>LH | 114.60                               |
| 16 |  |  | <b>Hit</b><br>Arc<br>VMH<br>LH | 107.58                               |



Supplementary Figure 7

| ID | MBH (Anterior) Cre IHC                                                              | MBH (Posterior) Cre IHC                                                              | Targeting                      | % original BW at 10 wks post-surgery |
|----|-------------------------------------------------------------------------------------|--------------------------------------------------------------------------------------|--------------------------------|--------------------------------------|
| 17 | 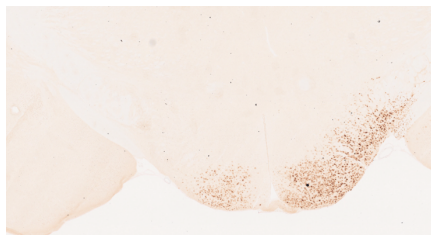   |    | <b>Hit</b><br>Arc<br>VMH<br>LH | 107.94                               |
| 18 |    |    | <b>Miss</b>                    | 118.18                               |
| 19 |   |   | <b>Hit</b><br>Arc<br>VMH<br>LH | 123.94                               |
| 20 |  |  | <b>Hit</b><br>Arc              | 123.83                               |
| 21 |  |  | <b>Hit</b><br>Arc<br>VMH<br>LH | 124.73                               |
| 22 |  |  | <b>Hit</b><br>Arc              | 114.89                               |

Supplementary Figure 7

| ID | MBH (Anterior) Cre IHC                                                              | MBH (Posterior) Cre IHC                                                              | Targeting                      | % original BW at 10 wks post-surgery |
|----|-------------------------------------------------------------------------------------|--------------------------------------------------------------------------------------|--------------------------------|--------------------------------------|
| 23 |    |    | <b>Hit</b><br>Arc<br>VMH<br>LH | 109.75                               |
| 24 |    |    | <b>Miss</b>                    | 131.77                               |
| 25 |   |   | <b>Hit</b><br>Arc<br>VMH<br>LH | 108.90                               |
| 26 |  |  | <b>Miss</b>                    | 119.86                               |

**B. Comparison of targeting sites and final body weight**

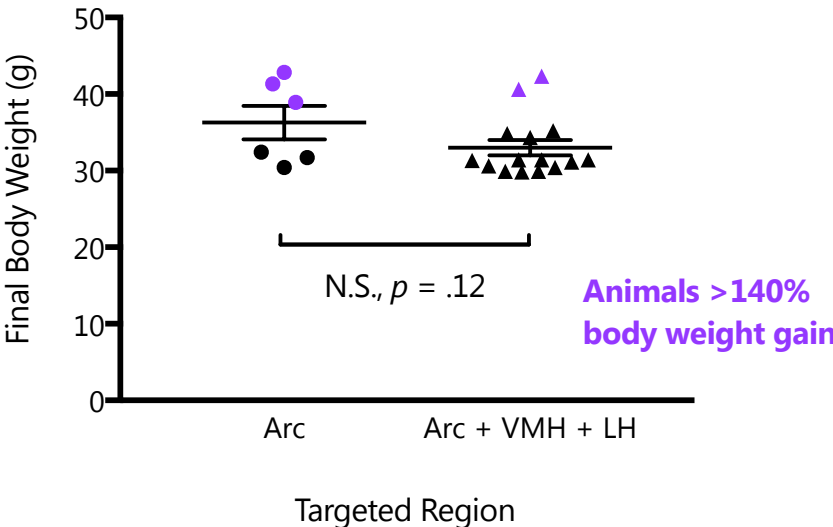

# Supplementary Figure 8

**A**

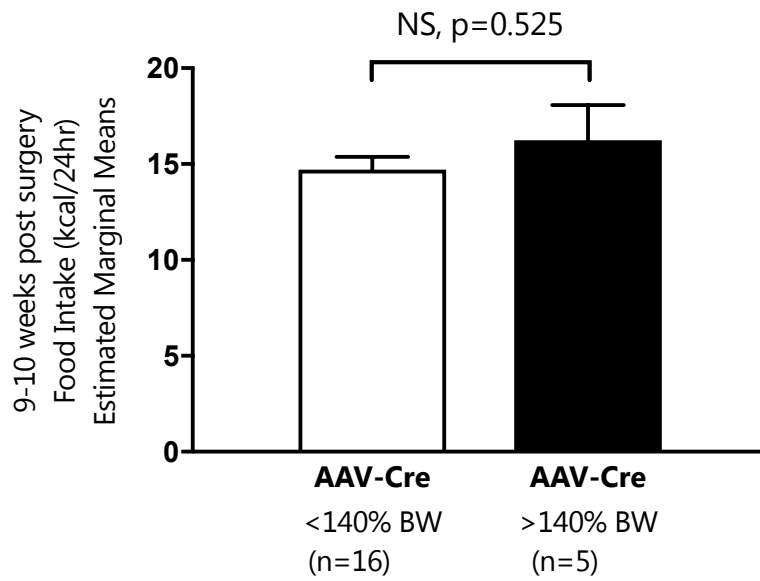

**B**

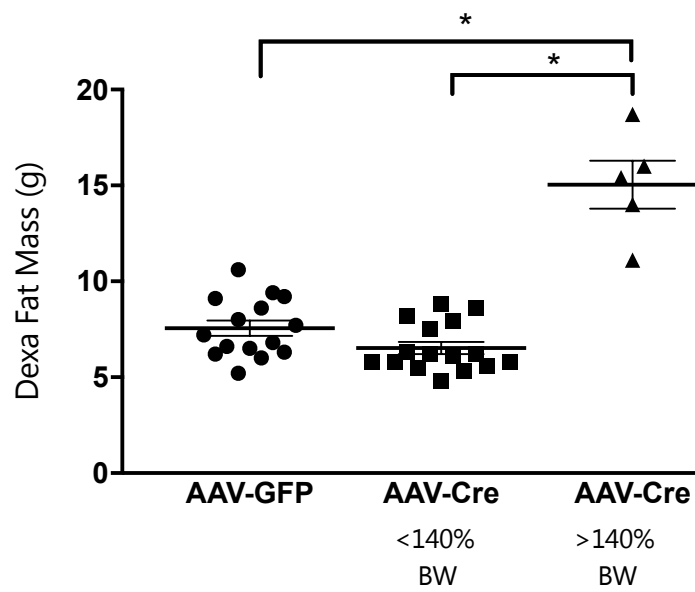

**C**

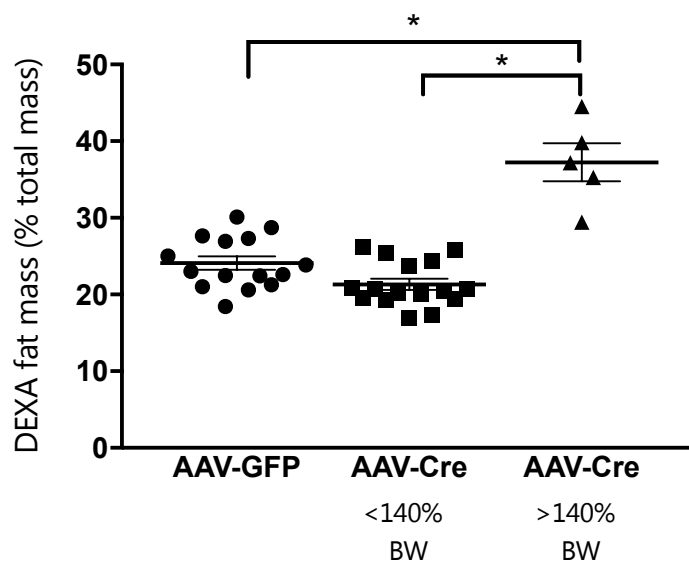

# Supplementary Figure 9

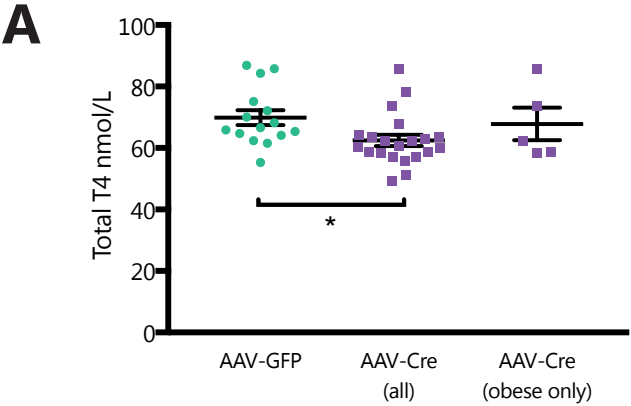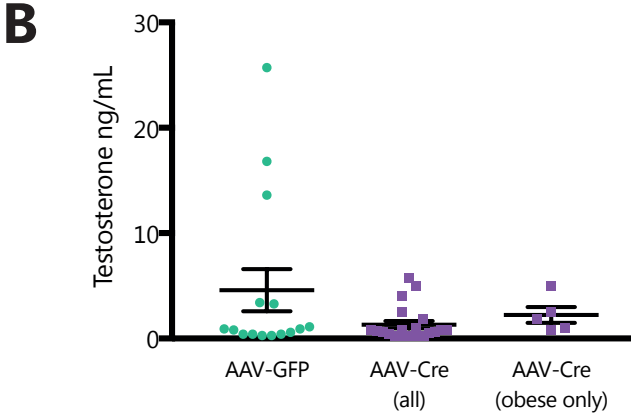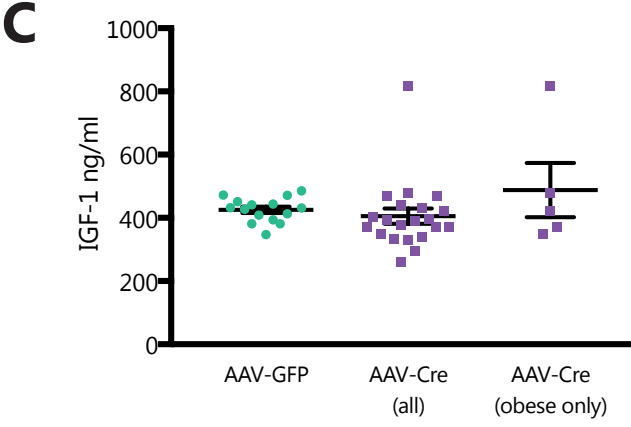

# Supplementary Figure 10

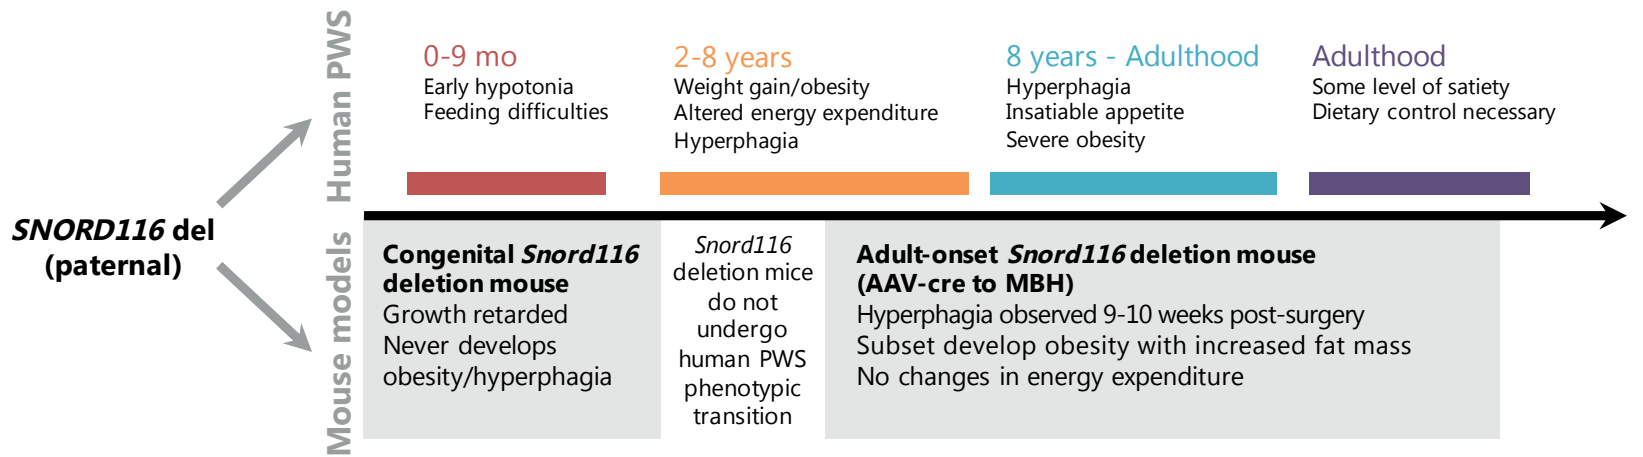

## Supplementary Figure Legends

### Supplementary Figure 1

#### **De novo deletions encompassing *SNORD116* are associated with most major PWS clinical phenotypes.**

Summary of published small deletions encompassing the *SNORD116* cluster. (+) indicates presence of the major clinical criterion in patient with deletion; (-) absence of phenotype; (+/-) partial agreement with PWS phenotype, with Duker et al. 2009 and Sahoo et al. 2008 patients displaying normal height and the DeSmith et al. 2009 patient displaying normal-sized hands and feet in contrast to typical PWS large deletion patients.

### Supplementary Figure 2

#### **Postnatal and adult body weight is lower in female *Snord116*<sup>+/-P</sup> mice compared to WT mice.**

**(A)** Postnatal body weight is lower in *Snord116*<sup>+/-P</sup> vs WT female mice, measured to 20 days after birth. Significant weight differences were observed from day 12 (two-way repeated measures ANOVA, \*\*  $p < 0.01$ , \*\*\*  $p < 0.001$ ) **(B)** Adult body weight in *Snord116*<sup>+/-P</sup> female mice remains below that of WT mice, measured between 3 to 16 weeks of age, with significant effect of genotype on body weight observed throughout adulthood (two-factor mixed-design ANOVA). Data shown as mean  $\pm$  SEM.

### Supplementary Figure 3

#### **Raw average daily food intake is lower in *Snord116*<sup>+/-P</sup> compared to WT mice.**

Daily food intake (10-day average) for *Snord116*<sup>+/-P</sup> mice is significantly lower than that observed for WT mice ( $t$ -test,  $p = 0.0002$ ). Data shown as mean  $\pm$  SEM.

### Supplementary Figure 4

#### **Re-feeding food intake after a 24-hour fast appears unaltered in *Snord116*<sup>+/-P</sup> mice either on chow or 45% high-fat diet.**

Re-feeding food intake ANCOVA-corrected for body weight across genotypes, at **(A)** 4-hours post-refeeding on chow ( $p = 0.714$ ), **(B)** 4-hours post-refeeding on 45% high-fat diet ( $p = 0.206$ , ANCOVA), **(C)** 24-hours post-refeeding on chow ( $p = 0.856$ , ANCOVA), **(D)** 24-hours post-refeeding on 45% high-fat diet ( $p = 0.643$ , ANCOVA). 5 WT and 6 *Snord116*<sup>+/-P</sup> male mice between 8-11 weeks of age were used. All data shown as mean  $\pm$  SEM. HFD, high-fat diet.

### Supplementary Figure 5

#### **Laser capture microdissection yields material specific to the dissected nucleus.**

**(A)** Hypothalamic nuclei segregate based on global transcriptomic profiles in a multi-dimensional scaling (MDS) plot of mapped reads in normalised counts per million from hypothalamic laser captured RNA samples. **(B)** Lists of the top 10 genes (by log fold change) with enriched expression in the given nucleus vs the other three captured nuclei.

#### Supplementary Figure 6

##### ***Pcsk1* and *Nhlh2* expression is unaltered in murine whole hypothalamic extracts.**

Relative expression of **(A)** *Pcsk1* and **(B)** *Nhlh2* normalised to *Gapdh* is also unaltered in whole microdissected murine hypothalami (adult male mice between 7-11 months of age), as determined by relative standard curve quantitative PCR ( $p > 0.67$  for all comparisons, two-way ANOVA with Tukey's post hoc). Bars display mean  $\pm$  SEM, with  $n=6$  (WT fed),  $n=5$  (WT fasted),  $n=4$  (*Snord116*<sup>+/-P</sup> fed),  $n=3$  (*Snord116*<sup>+/-P</sup> fasted).

#### Supplementary Figure 7

##### **Cre targeting with stereotaxic surgery**

**(A)** Images of brain sections from the mediobasal hypothalamus with Cre immunostaining visualised with DAB. (Note: the image in row 10 of this figure is re-used from Figure 3A) **(B)** Comparison of targeting sites and final body weights. ARC, arcuate nucleus; VMH, ventromedial hypothalamus; LH, lateral hypothalamus.

#### Supplementary Figure 8

##### **Obese AAV-Cre treated mice have increased adiposity, but not food intake, compared to non-obese AAV-Cre treated mice**

**(A)** There is no difference in food intake between the 5 obese (>140% original body weight) AAV-Cre treated mice vs the 16 non-obese (<140% original body weight) AAV-Cre treated mice ( $p=0.525$ , ANCOVA). Obese AAV-Cre mice have **(B)** increased absolute fat mass ( $p < 0.0001$ , one-way ANOVA, Tukey's) and **(C)** increased percentage fat mass ( $p < 0.0001$ , one-way ANOVA, Tukey's) compared to non-obese AAV-Cre mice and AAV-GFP injected mice. Bars display mean  $\pm$  SEM.

#### Supplementary Figure 9

##### **Serum profiling of AAV-injected mice for total thyroxine, testosterone and insulin-like growth factor 1**

Serum levels of **(A)** total thyroxine (T4), 10% decrease in all AAV-Cre hits ( $p=0.005$ , Mann-Whitney test), **(B)** testosterone and **(C)** insulin-like growth factor 1 (IGF-1) in AAV-GFP controls ( $n=15$ ), all AAV-Cre hits ( $n=21$ ), and obese AAV-Cre hits with >140% body weight gain post-surgery ( $n=5$ ). Bars display mean  $\pm$  SEM.

#### Supplementary Figure 10

##### **Modulating the onset of *Snord116* deletion in mouse is necessary to recapitulate early versus late stage phenotypes of human PWS.**

Overview highlighting the growth and energy homeostasis phenotypes resulting from loss of paternal *Snord116* expression in human and mouse.



Supplementary Table 1

**Reported phenotypes in *Snord116* deletion mouse models.**

Major phenotypes related to body weight, food intake (FI) and energy expenditure (EE) reported in bold. \* represent measures reported as divided by body weight. RER, respiratory exchange ratio.

Supplementary Table 2

**Differentially expressed genes in laser-captured hypothalamic RNA-sequencing of AAV-Cre and AAV-GFP treated mice.**

Tables of genes differentially expressed in AAV-Cre obese (>40% body weight gain post-surgery) vs AAV-GFP injected controls; AAV-Cre non-obese (<25% body weight gain post-surgery) vs AAV-GFP injected controls; and both AAV-Cre obese and non-obese vs AAV-GFP controls.
