# Supplementary material for: Hypothalamic loss of Snord116 recapitulates the hyperphagia of Prader-Willi syndrome
Source: JCI journal article supplement (doi:10.1172/jci97007), 2018-01-28
Supplement: sd2 [file 2]

**Supplementary Table 1**

| Mouse Model                                                                                | Body Weight/Length/Composition                                                                                                                                                                                                                                                                                                                                                      | Food Intake/Energy Expenditure                                                                                                                                                                                                                                                                                                                                                                                         | Reference                                             |
|--------------------------------------------------------------------------------------------|-------------------------------------------------------------------------------------------------------------------------------------------------------------------------------------------------------------------------------------------------------------------------------------------------------------------------------------------------------------------------------------|------------------------------------------------------------------------------------------------------------------------------------------------------------------------------------------------------------------------------------------------------------------------------------------------------------------------------------------------------------------------------------------------------------------------|-------------------------------------------------------|
| <b>Paternal <i>Snord116</i> deletion (Brosius)</b>                                         | <b>Growth retardation</b><br><b>Small body size</b> <ul style="list-style-type: none"> <li>•Growth retardation from P5</li> <li>•Low BW into adulthood</li> <li>•No obesity</li> </ul>                                                                                                                                                                                              | N/A                                                                                                                                                                                                                                                                                                                                                                                                                    | Skryabin et al. 2007 (1)<br><br>Lassi et al. 2015 (2) |
| <b>Paternal <i>Snord116</i> deletion (Francke)</b>                                         | <b>Growth retardation</b><br><b>Small body size</b> <ul style="list-style-type: none"> <li>•Growth retardation from P2; growth rate normalizes post-weaning, but weight differences remain.</li> <li>•Smaller BW (40% smaller than WT) through adulthood</li> <li>•Decreased body length</li> <li>•Lower fat mass (DEXA)</li> <li>•Low liver/stomach weight postnatally.</li> </ul> | <b>↑ Food intake*</b><br><b>↑ Energy expenditure*</b><br><b>Resistant to HFD and calorie restriction</b> <ul style="list-style-type: none"> <li>•Ding: No difference in fast-refeeding; males 48 hours from food reintroduction have slightly higher cumulative FI</li> <li>•Lin: Higher fast-refeeding FI from 100mins post food re-introduction</li> </ul>                                                           | Ding et al. 2008 (3)<br><br>Lin et al. 2014 (4)       |
| <b>Paternal <i>Snord116</i> deletion (Francke)</b>                                         | <b>Small body size</b><br><b>All mass components ↓</b> <ul style="list-style-type: none"> <li>•Low BW through 22 weeks of age.</li> <li>•Weight lower across fat, lean and total mass.</li> </ul>                                                                                                                                                                                   | <b>No diffs in food intake (12h average)</b><br><b>↑ Energy expenditure*</b> <ul style="list-style-type: none"> <li>•Increased day and night EE, but not independent of BW via ANCOVA.</li> <li>•Decreased RER in light hours, normal RER cycling.</li> </ul>                                                                                                                                                          | Powell et al. 2013 (5)                                |
| <b>Biallelic <i>Snord116</i> deletion (Francke)</b>                                        | <b>Small body size</b><br><b>↓ fat mass; ↑ lean mass</b> <ul style="list-style-type: none"> <li>•Low BW through 33 weeks of age.</li> <li>•Altered body composition in late adulthood (lower fat mass; slightly increased lean mass)</li> </ul> <p><u>At 30°C:</u><br/><b>Low body weight remains</b><br/><b>No difference in body length</b></p>                                   | <b>↑ Food intake*</b><br><b>↑ Energy expenditure*</b><br><b>Resistant to HFD and calorie restriction</b> <ul style="list-style-type: none"> <li>•Increased EE (light hours) only in early adulthood.</li> <li>•Increased fast-refeeding food intake only 48hrs from food re-introduction.</li> </ul> <p><u>At 30°C:</u><br/><b>No differences in food intake*</b><br/><b>No differences in energy expenditure*</b></p> | Qi et al. 2016 (6)<br><br>Qi et al. 2017 (7)          |
| <b>Biallelic <i>Snord116</i> deletion (Francke) in NPY neurons</b>                         | <b>Small body size</b><br><b>↓ fat mass</b> <ul style="list-style-type: none"> <li>•Lower BW through 17 weeks of age.</li> <li>•Shorter body length</li> </ul> <p><u>At 30°C:</u><br/><b>No difference in body length</b></p>                                                                                                                                                       | <b>↑ Food intake*</b><br><b>↑ Energy expenditure*</b> <ul style="list-style-type: none"> <li>•Increased daytime RER</li> </ul> <p><u>At 30°C:</u><br/><b>No differences in food intake*</b><br/><b>No differences in energy expenditure*</b> <ul style="list-style-type: none"> <li>•Lower RER and increase physical activity</li> </ul> </p>                                                                          | Qi et al. 2016 (6)<br><br>Qi et al. 2017 (7)          |
| <b><i>Snord116</i> deletion (Brosius); HPRT knock-in upstream maternal <i>Snord116</i></b> | <b>“Rescue” growth delay</b> <ul style="list-style-type: none"> <li>•Slight growth delay between P7-P19.</li> <li>•No difference in body weight compared to WT pups from 3 weeks old.</li> </ul>                                                                                                                                                                                    | N/A                                                                                                                                                                                                                                                                                                                                                                                                                    | Rozhdestvensky et al. 2016 (8)                        |
| <b>Tamoxifen-induced <i>Snord116</i> deletion</b>                                          | <b>No difference in total body weight</b><br><b>↑ White adipose tissue</b>                                                                                                                                                                                                                                                                                                          | <b>↓ Food intake*</b><br><b>↓ Refeeding food intake*</b>                                                                                                                                                                                                                                                                                                                                                               | Purtell et al. 2017 (9)                               |
| <b>Hypothalamic re-expression of <i>Snord116</i> in biallelic <i>Snord116</i> deletion</b> | <b>↓ Body weight gain</b><br><b>↓ Body length</b> <ul style="list-style-type: none"> <li>•No difference in fat or lean mass</li> </ul>                                                                                                                                                                                                                                              | <u>At room temperature:</u><br><b>No difference in food intake*</b><br><b>No difference in refeeding food intake*</b><br><b>↑ EE*</b><br><u>At 30°C:</u><br><b>↑Refeeding food intake at 48 hours*</b><br><b>↑ EE*</b>                                                                                                                                                                                                 | Qi et al. 2017 (10)                                   |

## Supplementary References

1. Skryabin BV et al. Deletion of the MBII-85 snoRNA gene cluster in mice results in postnatal growth retardation. *PLoS Genet.* 2007;3(12):e235.
2. Lassi G et al. Deletion of the Snord116/SNORD116 Alters Sleep in Mice and Patients with Prader-Willi Syndrome. *Sleep* 2016;39(3):637–644.
3. Ding F et al. SnoRNA Snord116 (Pwcr1/MBII-85) deletion causes growth deficiency and hyperphagia in mice. *PLoS ONE* 2008;3(3):e1709.
4. Lin D et al. Abnormal response to the anorexic effect of GHS-R inhibitors and exenatide in male Snord116 deletion mouse model for Prader-Willi syndrome. *Endocrinology* 2014;155(7):2355–2362.
5. Powell WT et al. A Prader-Willi locus lncRNA cloud modulates diurnal genes and energy expenditure. *Hum. Mol. Genet.* 2013;22(21):4318–4328.
6. Qi Y et al. Snord116 is critical in the regulation of food intake and body weight. *Sci Rep* 2016;6:18614.
7. Qi Y et al. Ambient temperature modulates the effects of the Prader-Willi syndrome candidate gene Snord116 on energy homeostasis. *Neuropeptides* 2017;61:87–93.
8. Rozhdestvensky TS et al. Maternal transcription of non-protein coding RNAs from the PWS-critical region rescues growth retardation in mice. *Sci Rep* 2016;6:20398.
9. Purtell L et al. Adult-onset deletion of the Prader-Willi syndrome susceptibility gene Snord116 in mice results in reduced feeding and increased fat mass. *Transl Pediatr* 2017;6(2):88–97.
10. Qi Y et al. Hypothalamus specific re-introduction of Snord116 into otherwise Snord116 deficient mice increased energy expenditure. *Journal of Neuroendocrinology* [published online ahead of print: January 17, 2017]; doi:10.1111/jne.12457
